# Supplementary material for: Phenyl introduced ammonium borohydride: synthesis and reversible dehydrogenation properties
Source: Royal Society of Chemistry journal article supplement (doi:10.1039/c2jm34766k), 2012-01-01
Supplement: c2jm34766k.pdf [file c2jm34766k.pdf]

## **Phenyl introduced ammoniumborohydride: synthesis and reversible dehydrogenation properties**

Shaofeng Li,<sup>a</sup> Ziwei Tang,<sup>a</sup> Qiaolong Gong,<sup>a</sup> Xuebin Yu,<sup>\*a</sup> P. Beaumont,<sup>b</sup>  
and Craig M. Jensen<sup>\*b</sup>

<sup>a</sup> *Department of Materials Science, Fudan University, Shanghai 200433, China*

<sup>b</sup> *Department of Chemistry, University of Hawaii at Manoa, 2545 The McCathy Mall,  
Honolulu, Hawaii 96822-2275, USA*

E-mail: yuxuebin@fudan.edu.cn; jensen@hawaii.edu

Supplementary Material (ESI)  
This journal is (c) The Royal Society of Chemistry 2012

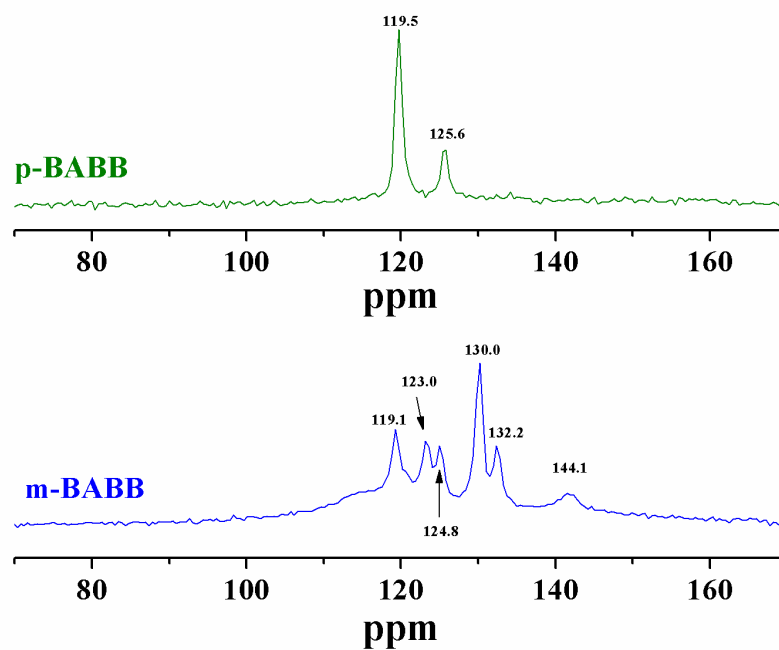

Fig. S1 Solid-state  $^{13}\text{C}$  MAS NMR spectrum of (up) p-BABB and (down) m-BABB.

Supplementary Material (ESI)  
This journal is (c) The Royal Society of Chemistry 2012

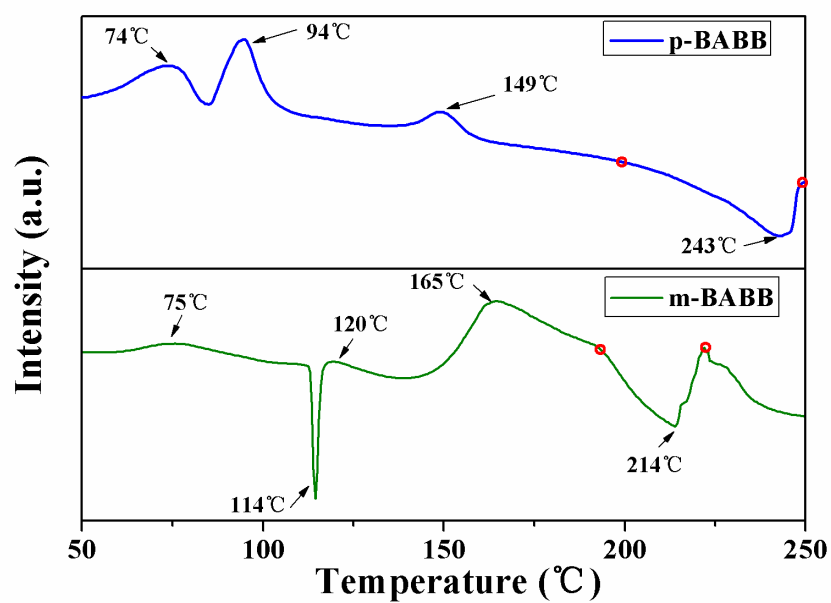

Fig. S2 DSC results of p-BABB and m-BABB from room temperature to 250 °C with a heating rate of 5 °C min<sup>-1</sup>.

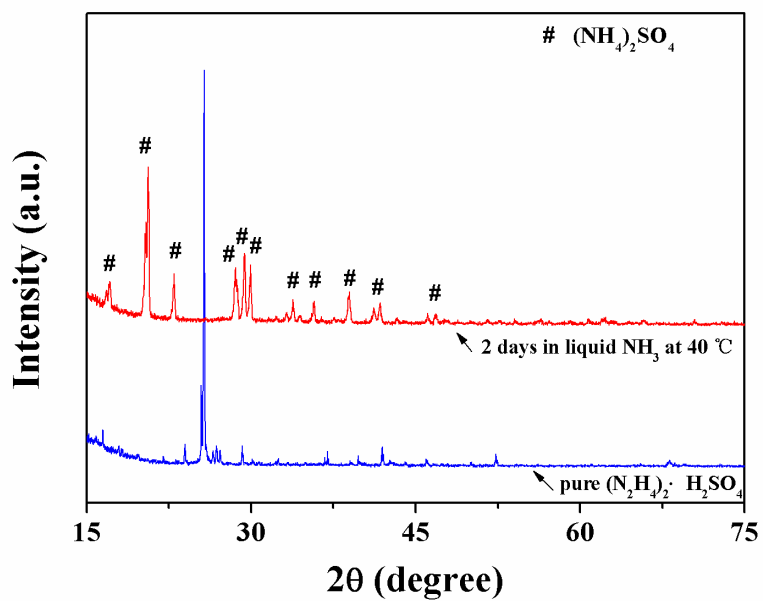

Fig. S3 XRD patterns for the pure (N<sub>2</sub>H<sub>4</sub>)<sub>2</sub>·H<sub>2</sub>SO<sub>4</sub> and the products of (N<sub>2</sub>H<sub>4</sub>)<sub>2</sub>·H<sub>2</sub>SO<sub>4</sub> after 2 days reaction in liquid NH<sub>3</sub> at 40 °C.

Supplementary Material (ESI)  
This journal is (c) The Royal Society of Chemistry 2012

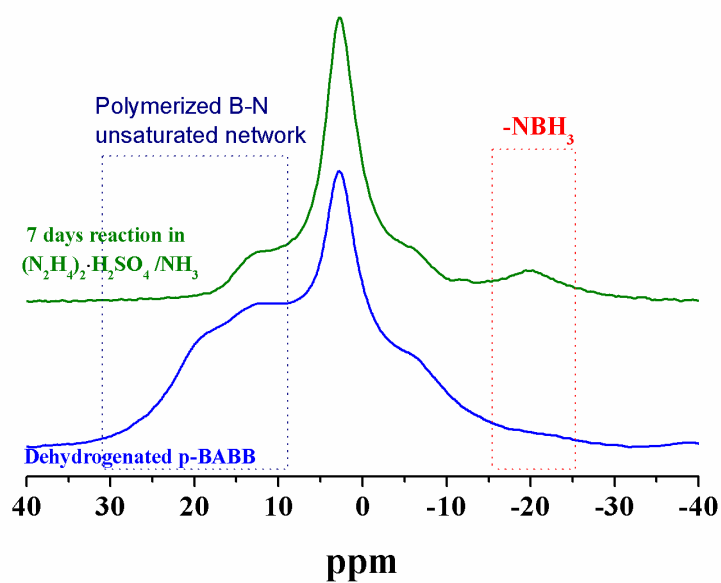

Fig. S4 Solid-state  $^{11}\text{B}$  NMR spectra of the dehydrogenated p-BABB after treating with  $(\text{N}_2\text{H}_4)_2 \cdot \text{H}_2\text{SO}_4$  in liquid  $\text{NH}_3$  for 7 days at  $45^\circ\text{C}$ .
